# Supplementary material
Source: publisher figshare collection journal article supplement (https://aacr.figshare.com/articles/dataset/_/23553168)
Supplement: Supplementary file 1 [file 41323677]

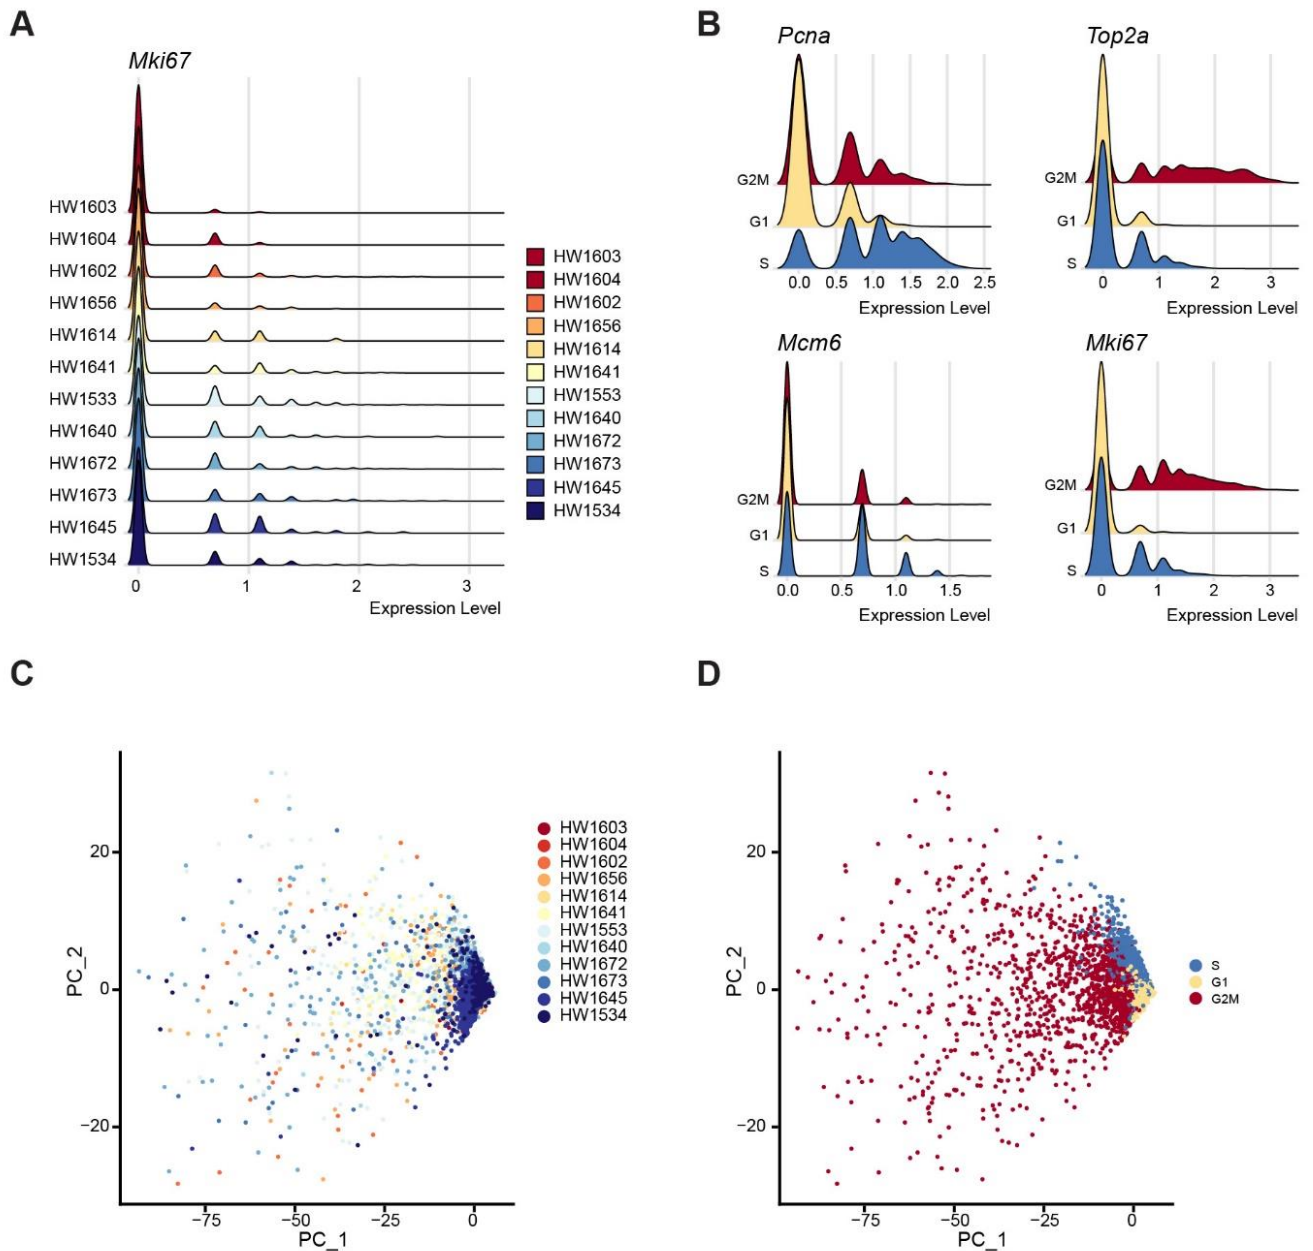

**Supplementary Figure S5 | Cell cycle stage assignment of the SCLC cells from the autochthonous model. A**, *Mki67* expression of the SCLC cells. **B**, Reliability of the cell cycle stage assignment by the markers (*Pcna*, *Top2a*, *Mcm6*, *Mki67*). Principal component plot of the autochthonous SCLC cells labeled by (C), and by cell cycle stage assignment (D).
